# Supplementary material for: Visual acuity outcome of stable proliferative diabetic retinopathy following initial complete panretinal photocoagulation
Source: HighWire-hosted journal article supplement (doi:10.1136/bmjophth-2022-001068), 2022-09-01

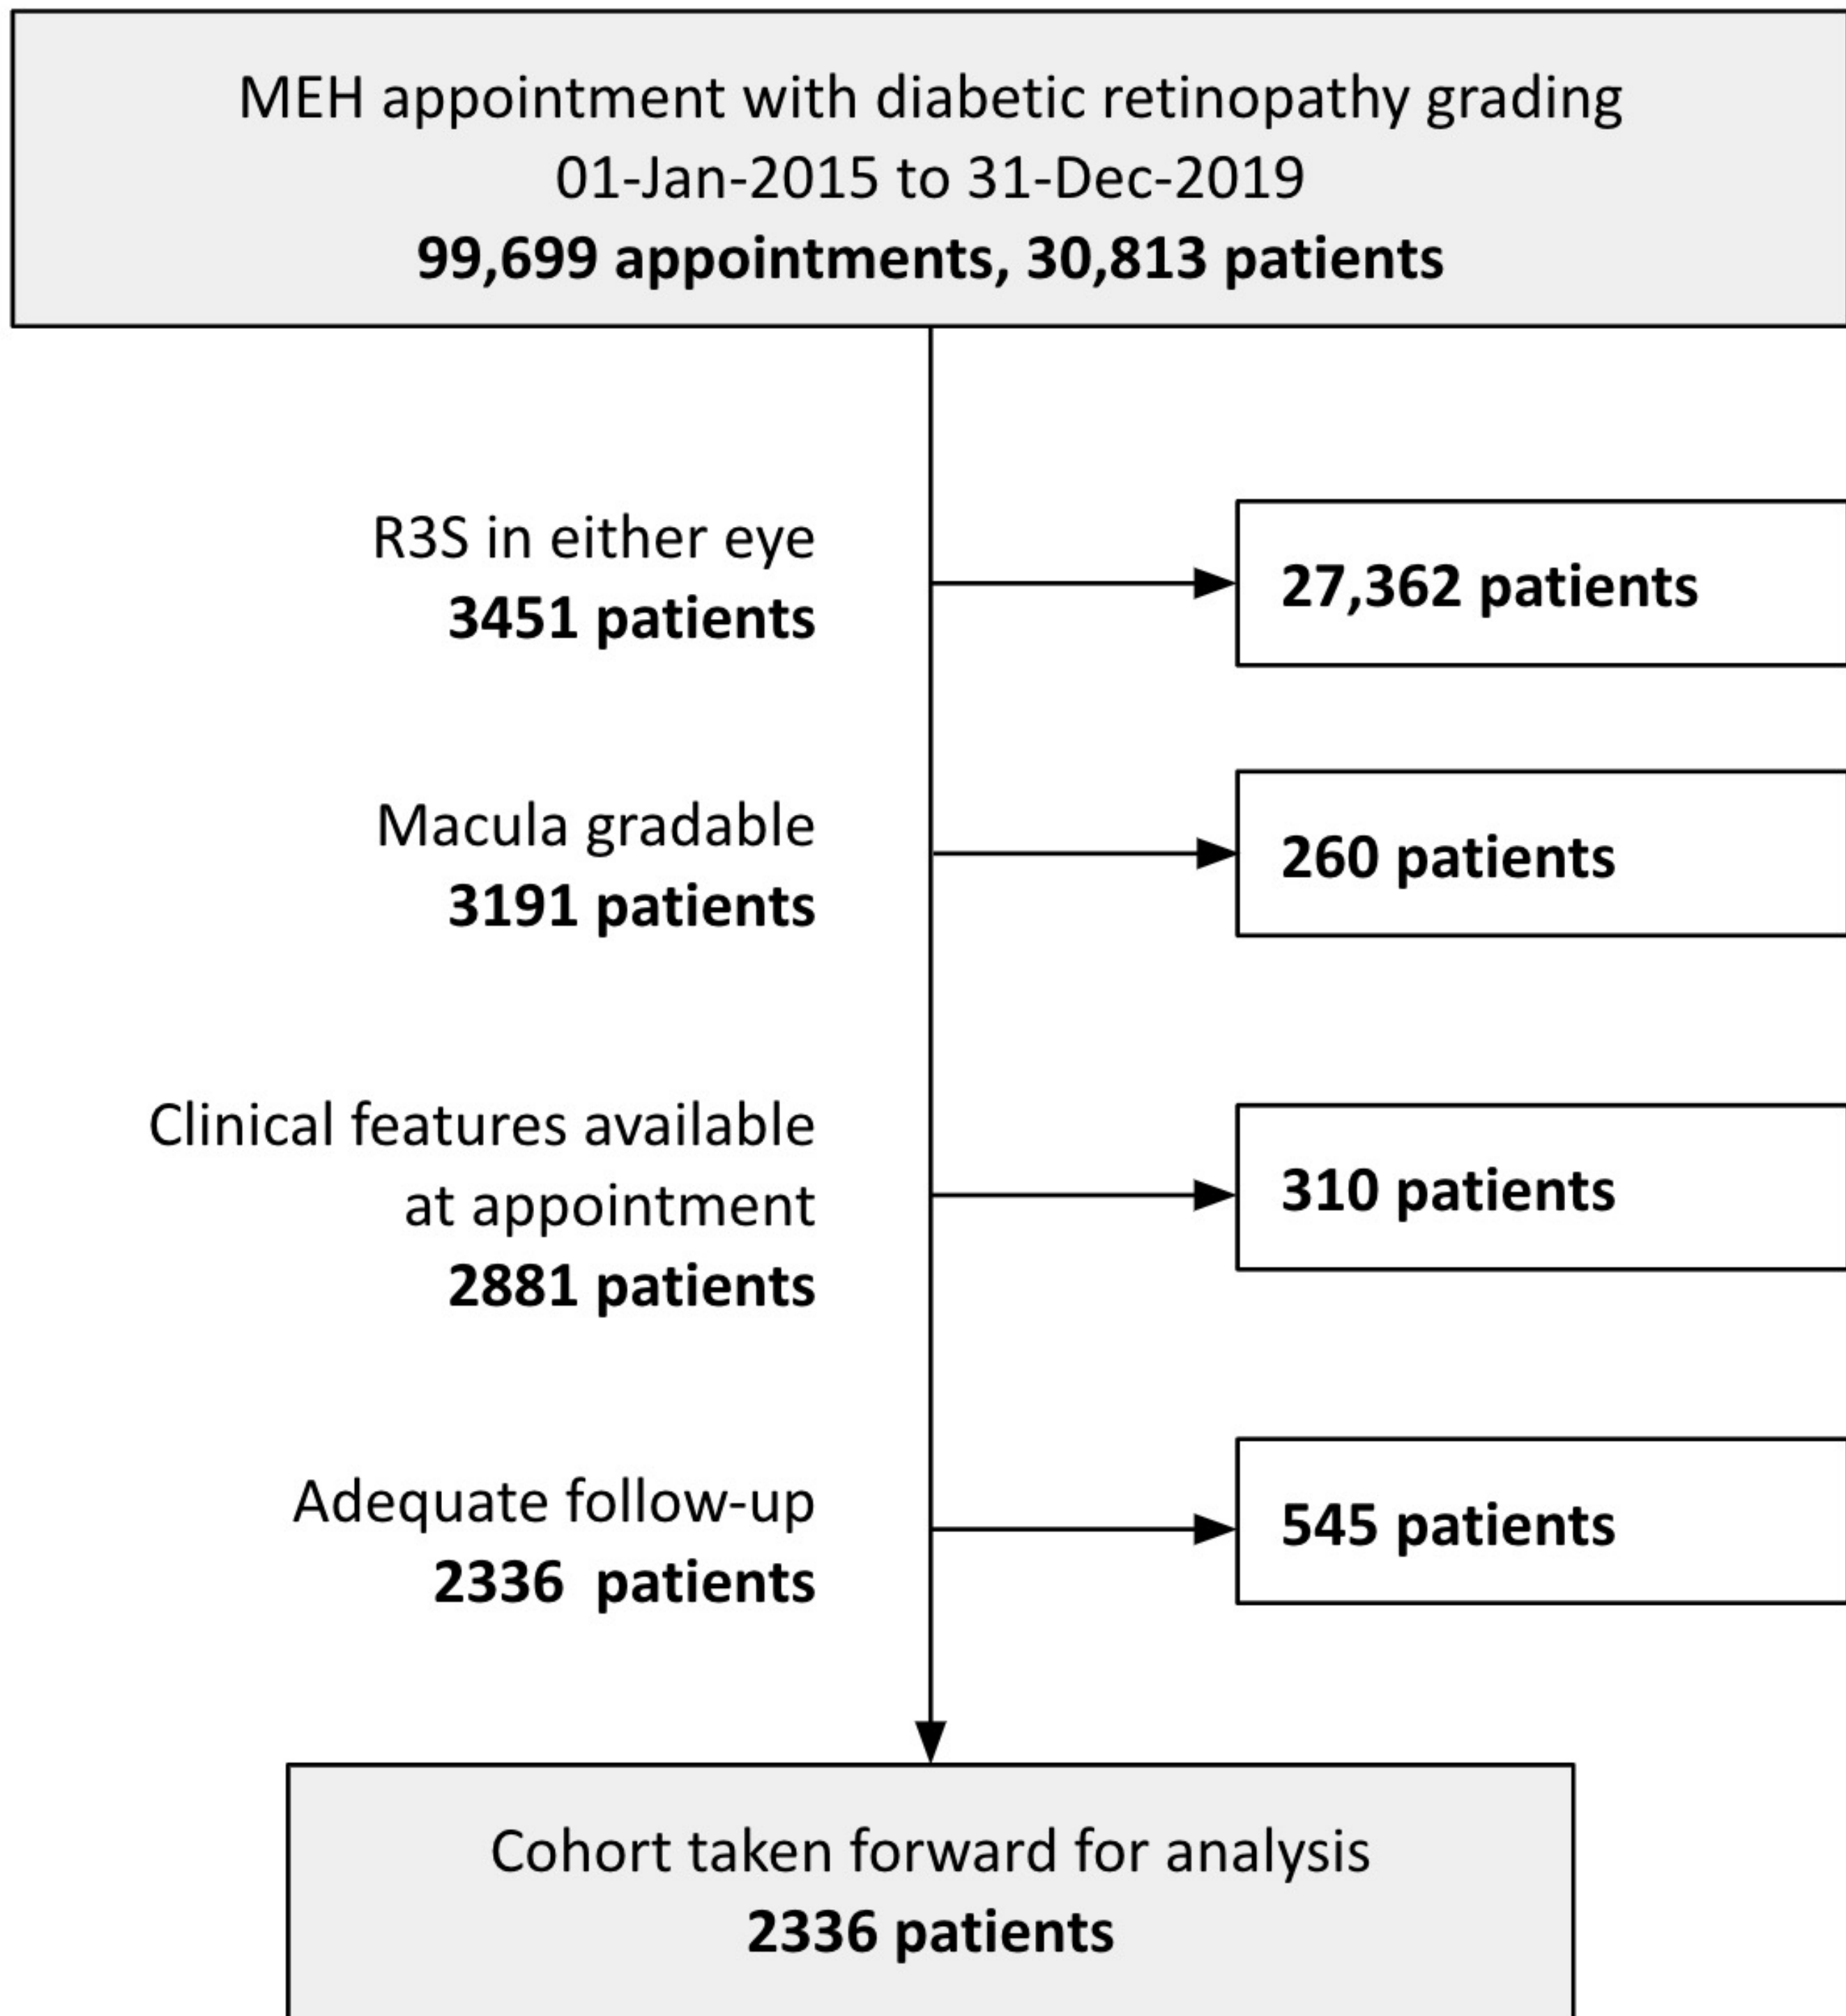

Supplement: bmjophth-2022-001068supp001_data_supplement.pdf [file bmjophth-2022-001068supp001_data_supplement.pdf]
