# Supplementary material for: Visual acuity outcome of stable proliferative diabetic retinopathy following initial complete panretinal photocoagulation
Source: HighWire-hosted journal article supplement (doi:10.1136/bmjophth-2022-001068), 2022-09-01
Supplement: bmjophth-2022-001068supp002_data_supplement.pdf [file bmjophth-2022-001068supp002_data_supplement.pdf]

|                               | <b>M0<br/>(N=1312)</b> | <b>M1A<br/>(N=373)</b> | <b>M1S<br/>(N=651)</b> | <b>Overall<br/>(N=2336)</b> |
|-------------------------------|------------------------|------------------------|------------------------|-----------------------------|
| <b>Fellow eye Retinopathy</b> |                        |                        |                        |                             |
| R0                            | 39 (3.0%)              | 9 (2.4%)               | 7 (1.1%)               | 55 (2.4%)                   |
| R1                            | 91 (6.9%)              | 27 (7.2%)              | 44 (6.8%)              | 162 (6.9%)                  |
| R2                            | 205 (15.6%)            | 94 (25.2%)             | 122 (18.7%)            | 421 (18.0%)                 |
| R3A                           | 227 (17.3%)            | 66 (17.7%)             | 94 (14.4%)             | 387 (16.6%)                 |
| R3S                           | 676 (51.5%)            | 165 (44.2%)            | 347 (53.3%)            | 1188 (50.9%)                |
| U                             | 74 (5.6%)              | 12 (3.2%)              | 37 (5.7%)              | 123 (5.3%)                  |
| <b>Fellow eye Macula</b>      |                        |                        |                        |                             |
| M0                            | 1033 (78.7%)           | 110 (29.5%)            | 148 (22.7%)            | 1291 (55.3%)                |
| M1A                           | 74 (5.6%)              | 182 (48.8%)            | 74 (11.4%)             | 330 (14.1%)                 |
| M1S                           | 130 (9.9%)             | 67 (18.0%)             | 387 (59.4%)            | 584 (25.0%)                 |
| U                             | 75 (5.7%)              | 14 (3.8%)              | 42 (6.5%)              | 131 (5.6%)                  |
| <b>Fellow eye laser</b>       |                        |                        |                        |                             |
| No                            | 390 (29.7%)            | 150 (40.2%)            | 192 (29.5%)            | 732 (31.3%)                 |
| Yes                           | 893 (68.1%)            | 219 (58.7%)            | 442 (67.9%)            | 1554 (66.5%)                |
| Missing                       | 29 (2.2%)              | 4 (1.1%)               | 17 (2.6%)              | 50 (2.1%)                   |

**Supplementary Table 1. Diabetic grading and status of fellow eye at first diagnosis of stable proliferative diabetic retinopathy in study eye**
